# Supplementary material for: Downregulation of MCL-1 and upregulation of PUMA using mTOR inhibitors enhance antitumor efficacy of BH3 mimetics in triple-negative breast cancer
Source: PubMed Central journal article supplement (PMC5833778; doi:10.1038/s41419-017-0169-2), 2018-01-26
Supplement: 41419_2017_169_MOESM1_ESM.pdf [file 41419_2017_169_MOESM1_ESM.pdf]

## Supplementary information

# Down-regulation of MCL-1 and up-regulation of PUMA using mTOR inhibitors enhance antitumor efficacy of BH3 mimetics in Triple Negative Breast Cancer

Haolong Li <sup>a,b</sup>, Lei Liu <sup>a,b,\*</sup>, Haocai Chang <sup>a</sup>, Zhengzhi Zou <sup>a,b</sup> and Da Xing <sup>a,b,\*</sup>

<sup>a</sup> MOE Key Laboratory of Laser Life Science & Institute of Laser Life Science,  
College of Biophotonics, South China Normal University, Guangzhou, 510631, China

<sup>b</sup> Joint Laboratory of Laser Oncology with Cancer Center of Sun Yat-sen University,  
South China Normal University, Guangzhou, 510631, China

\*Correspondence:

Da Xing

Phone: +86-20-85210089; Fax: +86-20-85216052; E-mail: [xingda@scnu.edu.cn](mailto:xingda@scnu.edu.cn)

Or Lei Liu

Phone: +86-20-8521436; Fax: +86-20-85216052; E-mail: [liulei@scnu.edu.cn](mailto:liulei@scnu.edu.cn)

**Running title:** mTOR inhibitors sensitize TNBC to BH3 mimetics

## **Supplementary materials and methods**

### **Time-lapse confocal fluorescence microscopy for monitoring BAX translocation.**

For monitoring BAX translocation, a time-lapse confocal fluorescence microscopy was used as previously described.<sup>1</sup> After co-transfected GFP-BAX and DesRed-mit plasmid for 24 h, MDA-MB-231 cells were treated with BEZ235, ABT263, or their combination. Living cell images were obtained using a time series program in confocal microscope (LSM 510, ZEISS) at 37°C with 5% CO<sub>2</sub>.

## **References**

1. Liu L, Xing D, Chen WR. Micro-calpain regulates caspase-dependent and apoptosis inducing factor-mediated caspase-independent apoptotic pathways in cisplatin-induced apoptosis. *International journal of cancer* 2009, **125**(12): 2757-2766.

## Supplementary Figures

Figure S1

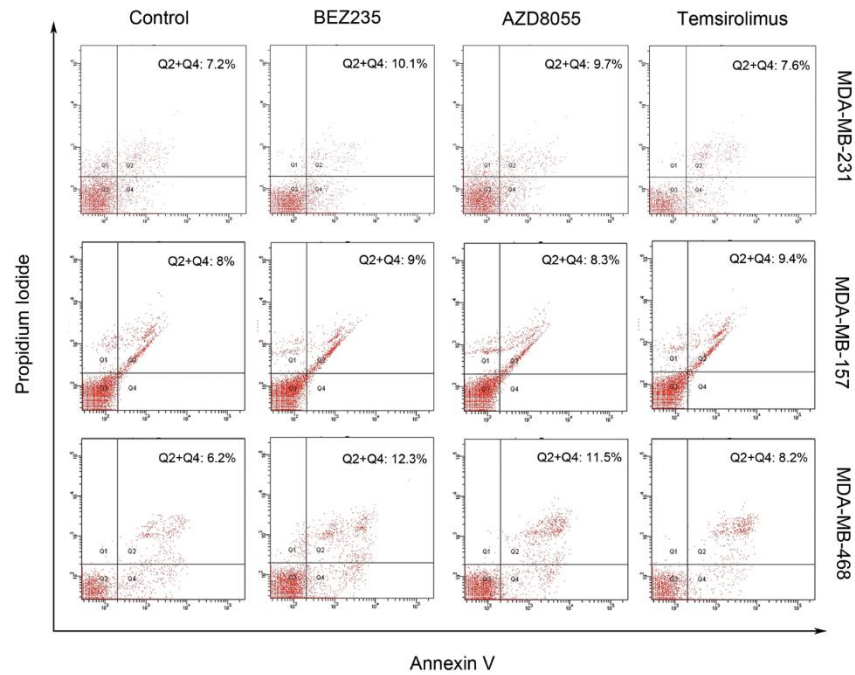

**Figure S1** mTOR inhibitors fail to induce obvious apoptosis in different TNBC cells.

MDA-MB-231, MDA-MB-157 and MDA-MB-468 cells were treated with indicated mTOR inhibitors (1  $\mu$ M) for 24 h, and apoptosis analysis was performed by using Annexin V-FITC/PI staining.

**Figure S2**

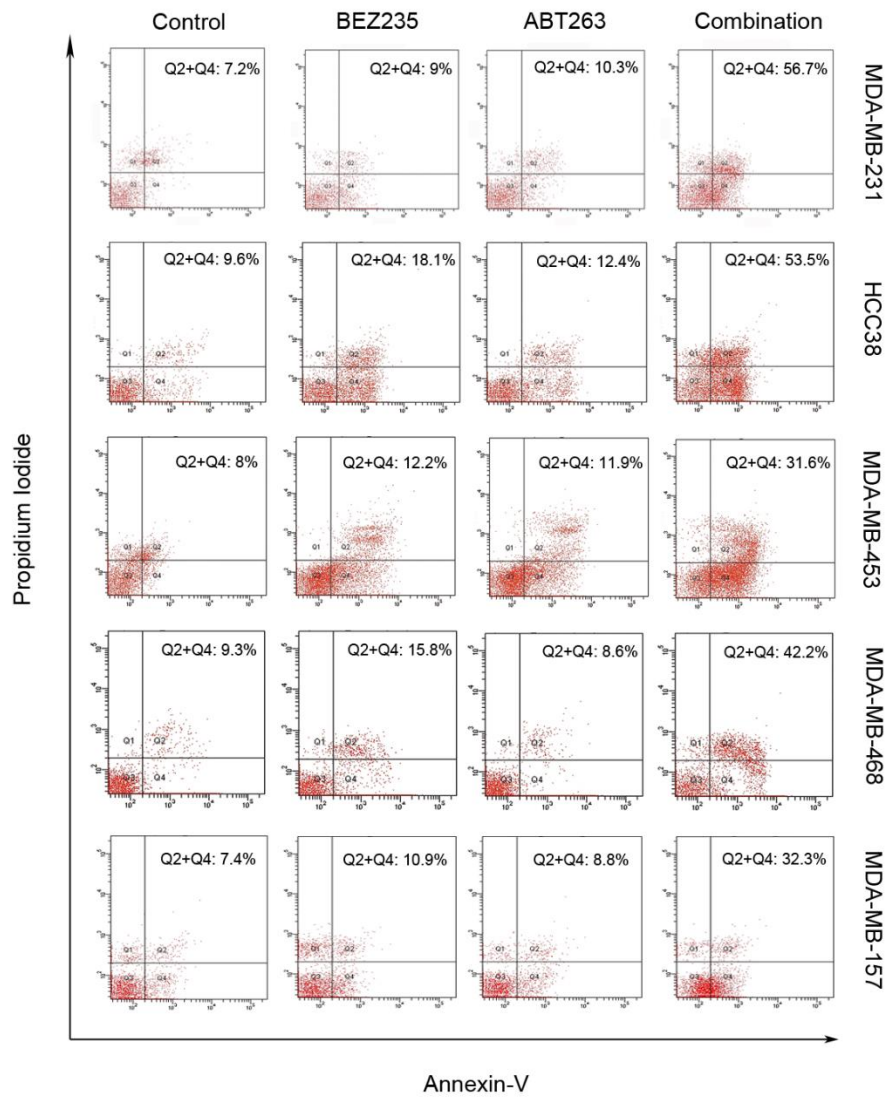

**Figure S2** Suppression of MCL-1 sensitizes TNBC cells to ABT-263. Apoptosis analysis of different TNBC cells treated with no drug (control), BEZ235 (1  $\mu$ M) and/or ABT263 (1  $\mu$ M) for 24 h.

### Figure S3

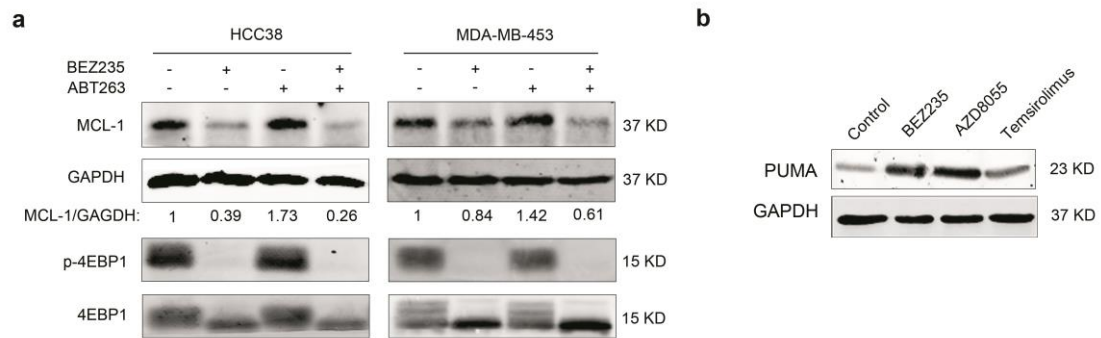

**Figure S3** BEZ235 suppresses MCL-1 and up-regulates PUMA. **(a)** Immunoblotting analysis of MCL-1 and p-4EBP1 in HCC38 and MDA-MB-453 cells following treating with no drug (control), BEZ235 (1  $\mu$ M) and/or ABT263 (1  $\mu$ M) for 24 h. GAPDH served as loading control. **(b)** Immunoblotting analysis of expression level of PUMA in MDA-MB-231 cells following different mTOR inhibitors (1  $\mu$ M) treatment.

**Figure S4**

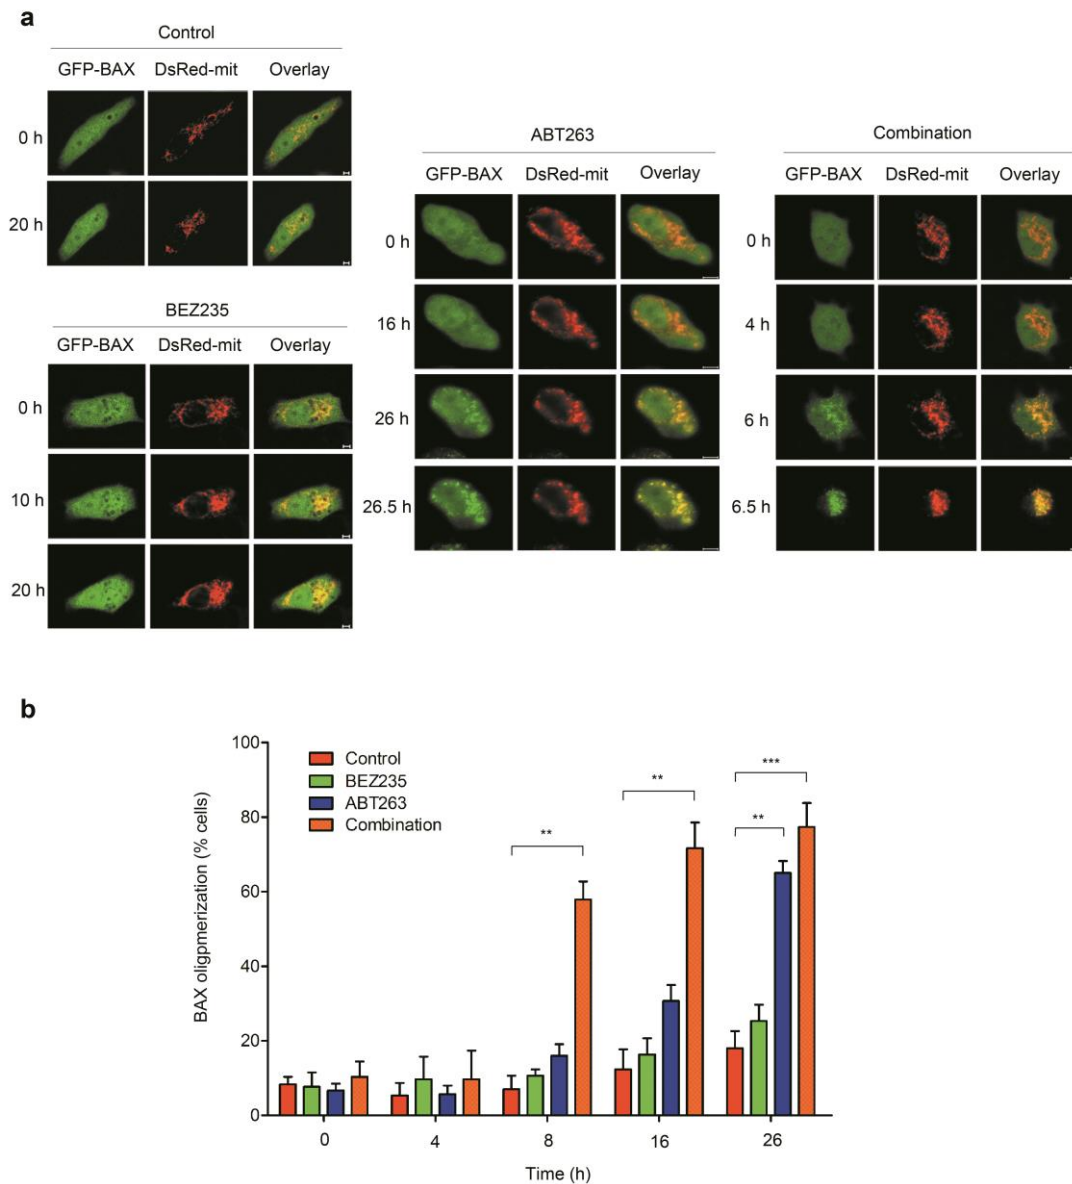

**Figure S4** Combination of BEZ235 and ABT263 induces BAX redistribution. **(a)** Real-time detection of BAX translocation under indicated treatment. Typical time-lapse confocal images of MDA-MB-231 cells co-transfected with GFP-BAX and DsRed-mit following different treatments are displayed, bar = 5  $\mu$ m. **(b)** Quantification of cells showing BAX oligomerization. After different treatments as indicated, the percentage of cells showing BAX oligomerization was assessed by counting the number of cells

exhibiting mitochondrial BAX.  $**P < 0.01$  and  $***P < 0.001$  vs. indicated control group.

**Figure S5**

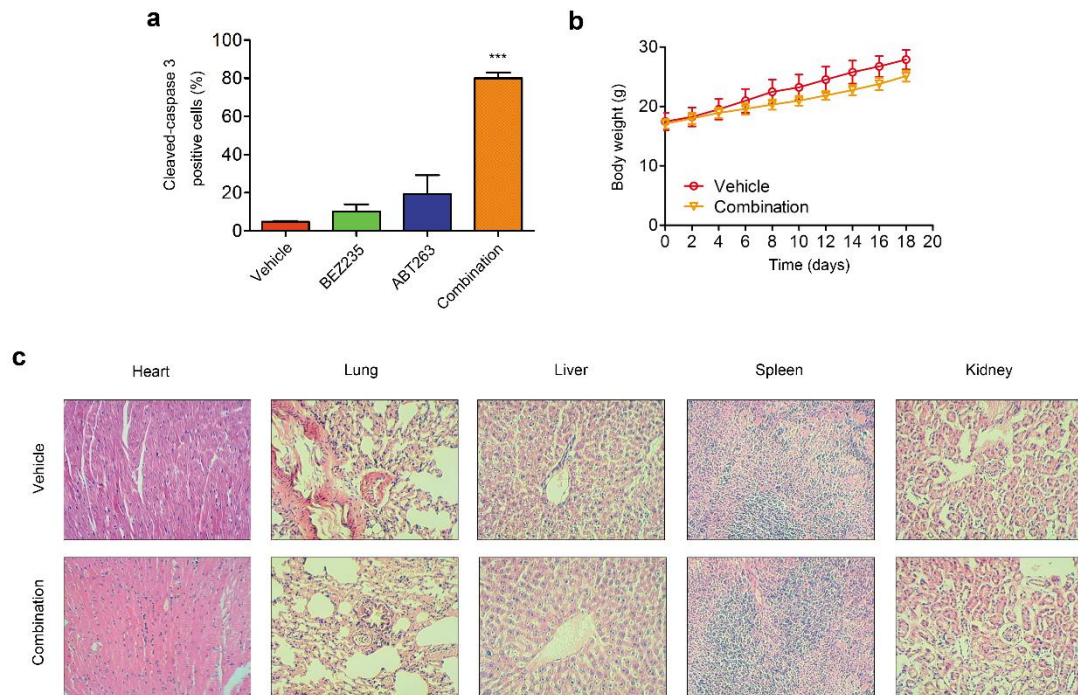

**Figure S5** The combination therapy of BEZ235 and ABT263 potently represses tumor growth *in vivo*. **(a)** Quantity analysis of CC3-positive cells shown in Figure 5d. \*\*\* $P < 0.001$  vs. control group. **(b)** MDA-MB-231 xenografts were treated with vehicle, BEZ235 (15mg/kg) and/or ABT263 (25mg/kg), and body weights of mice were measured every two days over 3 weeks. Error bar represents SEM ( $n \geq 4$ ). **(c)** H&E staining analysis of different organs from mice following indicated treatments. Representative images are shown (magnification: 20 $\times$ ).
